# Supplementary material for: Evaluating the combined estrogenic effects of plant growth regulators via electrochemical and E-Screen methods
Source: Royal Society of Chemistry journal article supplement (doi:10.1039/d4ra06838f), 2024-01-01
Supplement: d4ra06838f1.pdf [file d4ra06838f1.pdf]

## Supporting Information

### Evaluating the Combined Estrogenic Effects of Plant Growth Regulators via Electrochemical and E-Screen Methods

Xijie Wang<sup>1</sup>, Zijia Zhao<sup>1</sup>, Shulan Qi<sup>1</sup>, Zan Li<sup>1</sup>, Zhong Wang<sup>2,3</sup>, Shi Zhou<sup>1,2,\*</sup>, Jiwen Cui<sup>1,2,\*\*</sup>, Jinlian  
Li<sup>1,2,\*\*\*</sup>, Dongmei Wu<sup>1,2</sup>

<sup>1</sup> College of Pharmacy, Jiamusi University, Jiamusi, Heilongjiang 154007, P. R. China.

<sup>2</sup> Heilongjiang Provincial Key Laboratory of New Drug Development and  
Pharmacotoxicological Evaluation, Jiamusi University, Jiamusi 154007, China.

<sup>3</sup> College of Biology and Agriculture, Jiamusi University, Jiamusi, Heilongjiang  
154007, P. R. China.

\* Corresponding author. E-mail addresses: zhous146@nenu.edu.cn (S. Zhou)

\*\* Corresponding author. E-mail addresses: cjwhljms@163.com (J. Cui)

\*\*\* Corresponding author. E-mail addresses: lijnlian@jmsu.edu.cn (J. Li)

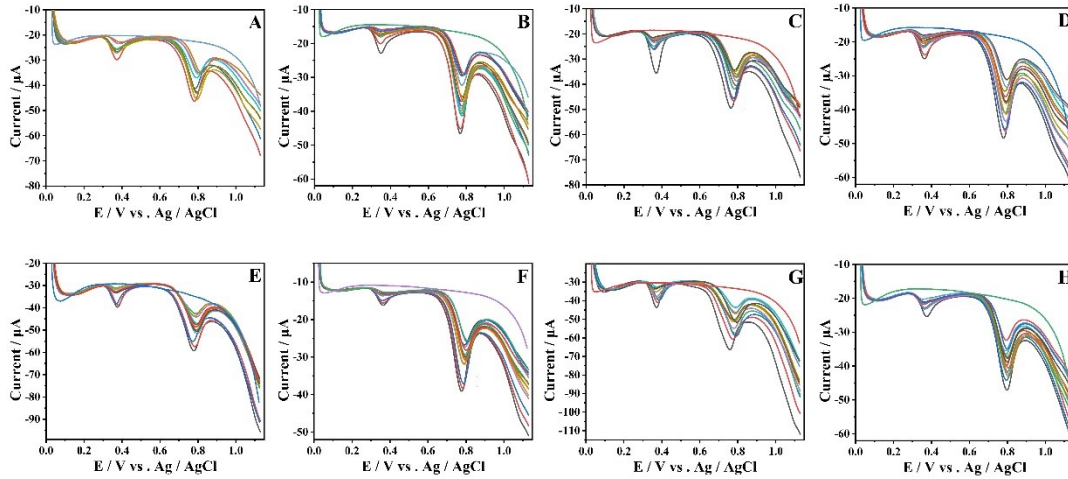

Fig. S1 LSV of estrogen free MCF-7 cells exposed to different doses of PGRs  
 A. E2, B. GA3, C. ETH, D NAA, E. GA<sub>3</sub> : ETH = 1:1, F. GA<sub>3</sub> : NAA = 1:1, G. ETH : NAA = 1:1, H. GA<sub>3</sub> : ETH : NAA = 1:1:1  
 Working electrode: MWCNTs/GCE, enrichment time: 360 s, applied potential: 0 V. Purine standards concentration:  $5 \times 10^{-6} \text{ mol} \cdot \text{L}^{-1}$ , cell concentration:  $1 \times 10^6 \text{ cells} \cdot \text{dish}^{-1}$ . Cell culture time: 96 h.

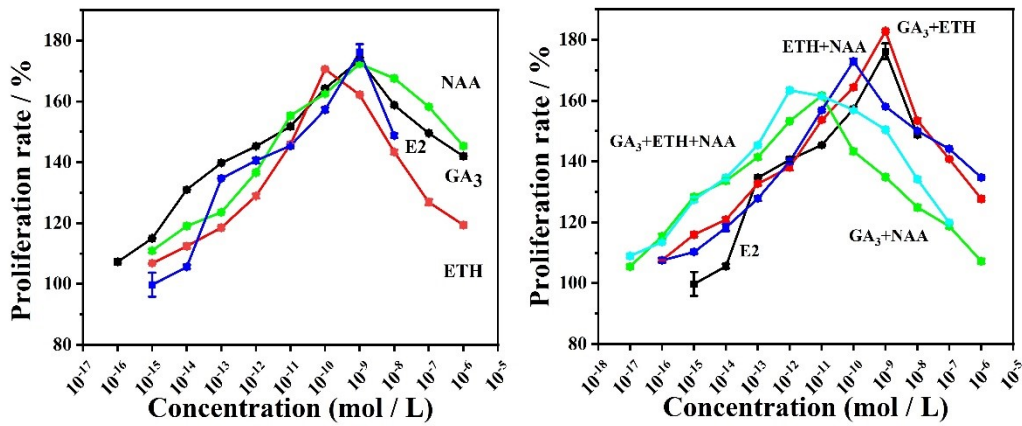

Fig. S2 E-Screen assay for the proliferation rate of Estrogen-free MCF-7 cells exposed to different doses of PGRs.  
 A. Single action, B. Combined action.  
 Cell concentration:  $1 \times 10^5 \text{ cell} \cdot \text{well}^{-1}$ , drug action time: 72 h. control group: E2, concentration ratios of the combined PGRs: GA<sub>3</sub> : ETH=1 : 1, GA<sub>3</sub> : NAA=1: 1, ETH: NAA=1: 1, GA<sub>3</sub> : ETH: NAA=1: 1: 1

Table S1. AI evaluation results for PGRs combined estrogenic effects type at isomolar concentration.

| Mixtures                 | Electrochemistry |             | E-Screen |             |
|--------------------------|------------------|-------------|----------|-------------|
|                          | AI               | Description | AI       | Description |
| GA <sub>3</sub> +ETH     | -2.70            | Antagonism  | -0.40    | Antagonism  |
| GA <sub>3</sub> + NAA    | 2.43             | Synergism   | 3.97     | Synergism   |
| ETH + NAA                | 0                | Additive    | 0        | Additive    |
| GA <sub>3</sub> +ETH+NAA | 68.98            | Synergism   | 14.51    | Synergism   |

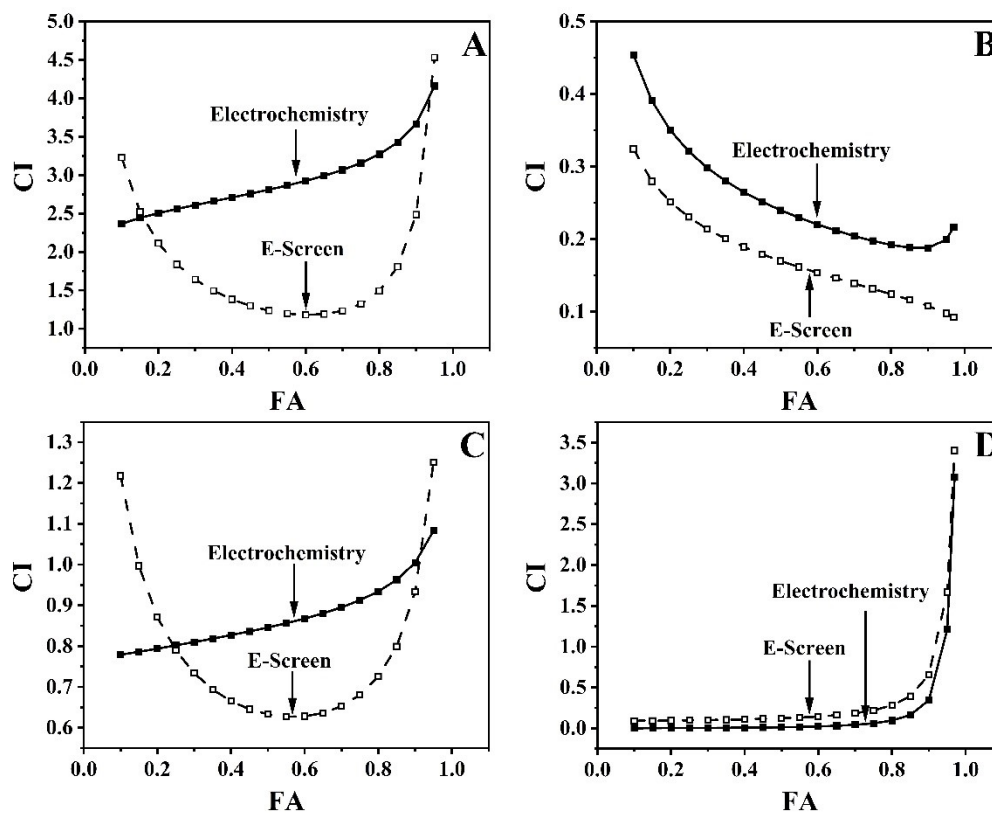

Fig. S3 FA-CI plot of PGRs combined estrogenic effects type at isomolar concentration.  
 A. GA<sub>3</sub>: ETH=1: 1, B. GA<sub>3</sub>: NAA=1: 1, C. ETH: NAA = 1: 1, D. GA<sub>3</sub>: ETH: NAA = 1: 1: 1
